# Supplementary material
Source: publisher figshare collection journal article supplement (https://brill.figshare.com/ndownloader/files/14478977)
Supplement: Supplementary file 1 [file 14478977]

Lecture 5

**Emotions II.: Life and happiness**

The concept of happiness is characterized by the same cognitive devices as we have seen above for the concept of emotion; that is, metaphors, metonymies, related concepts, and cognitive models. The description of happiness in this section is largely based on Kövecses (1991).

**Conceptual metaphors of happiness**

General emotion metaphors

happiness is a fluid in a container She was *bursting with* joy.

happiness is heat/fire *Fires* of joy were *kindled* by the birth of her son.

happiness is a natural force I was *overwhelmed* by joy.

happiness is a physical force He was *hit* by happiness.

happiness is a social superior They live a life *ruled* by happiness.

happiness is an opponent She was *seized* by joy.

happiness is a captive animal All joy *broke loose* as the kids opened their presents.

happiness is insanity The crowd *went crazy* with joy.

happiness is a force dislocating the self He was *beside himself* with joy.

happiness is a disease Her good mood was *contagious*.

Metaphors providing an evaluation of happiness

happiness is light He was *beaming* with joy.

happiness is feeling light (not heavy) I was *floating*.

happiness is up I’m feeling *up* today.

happiness is being in heaven I was in *seventh heaven*.

Metaphors providing the phenomenological character of happiness

happiness is an animal that lives well I was *purring* with delight.

happiness is a pleasurable physical sensation I was *tickled pink*.

happiness is being drunk It was an *intoxicating* experience.

happiness is vitality He was full of *pep*.

happiness is warmth What she said made me feel *warm* all over.

**Conceptual metonymies of happiness**

Behavioral responses

jumping up and down for happiness (*jump up and down* with joy)

dancing/singing for happiness (*dance* with joy)

Physiological responses

flushing for happiness (*flush/beam* with joy)

increased heart rate for happiness (*heart beats* with joy)

body warmth for happiness (be *warm* with joy)

agitation/excitement for happiness (be *excited* with joy)

Expressive responses

bright eyes for happiness (*shine* with happiness/joy)

smiling for happiness (*smile/laugh*)

**Related concepts**

(feeling of) satisfaction (a *satisfied*/*contented* baby, a *contented* smile)

(feeling of) pleasure (do it with *pleasure*)

(feeling of) harmony (feel happiness and *harmony*)

**Prototypical cognitive models of happiness**

Happiness as an immediate response

“joy/happiness.”

Cause of joy:

You want to achieve something.

You achieve it.

There is an immediate emotional response to this on your part.

Existence of joy:

You are satisfied.

You display a variety of expressive and behavioral responses including brightness of the eyes, smiling, laughing, jumping up and down.

You feel energized.

You also experience physiological responses, including body warmth and agitation/excitement.

The context for the state is commonly a social one involving celebrations.

You have a positive outlook on the world.

You feel a need to communicate your feelings to others.

The feeling you have may “spread” to others.

You experience your state as a pleasurable one.

You feel that you are in harmony with the world.

You can’t help what you feel; you are passive in relation to your feelings.

The intensity of your feelings and experiences is high.

Beyond a certain limit, an increase in intensity implies a social danger for you to become dysfunctional, that is, to lose control.

It is not entirely acceptable for you to communicate and/or give free expression to what you feel (i.e., to lose control).

Attempt at control:

Because it is not entirely acceptable to communicate and/or give free expression of what you feel, you try to keep the emotion under control: You attempt not to engage in the behavioral responses and/or not to display the expressive responses and/or not communicate what you feel.

Loss of control:

You nevertheless lose control.

Action:

You engage in behavioral responses and/or display expressive responses and/or communicate what you feel. You may, in addition, exhibit wild, uncontrolled behavior (often in the form of dancing, singing, and energetic behavior with a lot of movement).

happiness is a natural force, happiness is an opponent, happiness is a captive animal, and happiness is insanity. (we are *overwhelmed*, we are *seized*, we *go crazy*, etc.).

Happiness as a value

happiness is light He was *beaming* with joy.

happiness is feeling light (not heavy) I was *floating*.

happiness is up I’m feeling *up* today.

happiness is being in heaven I was in *seventh heaven*.

happiness is a hidden desired object At long last I have *found* happiness.

Goals in life:

(freedom, health, wealth, love)

Action in accordance with the goals:

It is difficult to obtain.

It requires effort to obtain it.

It takes a long time to obtain it.

Once people have obtained it, it lasts a long time.

Desired result:

Achieving goals  Happiness

Happiness is associated with positive value.

Happiness is pleasurable.

Happiness gives you a feeling of harmony with the world.

*joy* for “happiness as an immediate response” and *happiness* for “happiness as a value.”

Kövecses, 1991; Stefanowitsch, 2004 and Tseng, Hu, Han, and Bergen, 2007.

**The metaphorical conceptualization of life**

Life is a journey

Life is a building

Life is a machine

Life is a play

Life is a precious possession

Life is a story

Life is fire/a flame

Life is light

A lifetime is a day

A lifetime is a year

Life is a substance/fluid in a container

Life is being present here

Life is bondage

Life is a burden

Human life is the life-cycle of a plant

journey: life:

traveler => person leading a life

journey => leading a life

destination => purpose/goal of life

stages of journey => stages in life

distance covered => progress made

paths of the journey => ways of living

obstacles along the way => difficulties in life

**Happiness in the United States Declaration of Independence**

When in the Course of human events it becomes necessary for one people to dissolve the political bands which have connected them with another and to assume among the powers of the earth, the separate and equal station to which the Laws of Nature and of Nature's God entitle them, a decent respect to the opinions of mankind requires that they should declare the causes which impel them to the separation.

We hold these truths to be self-evident, that all men are created equal, that they are endowed by their Creator with certain unalienable Rights, that among these are Life, Liberty and the pursuit of Happiness. — That to secure these rights, Governments are instituted among Men, deriving their just powers from the consent of the governed, — That whenever any Form of Government becomes destructive of these ends, it is the Right of the People to alter or to abolish it, and to institute new Government, laying its foundation on such principles and organizing its powers in such form, as to them shall seem most likely to effect their Safety and Happiness.

ontological status of an object: happiness is an object, states are objects.

“*pursuit* of happiness,” happiness is a desired state; happiness is a desired object. desired animal object is moving away from us (the pursuer) and we are pursuing it.

desired object is hidden and this is what makes it difficult for us to find it.

happiness is a desired object

Version one: moving desired object

The desired object  the happiness

The movement (of the object) away from us  the difficulty (of obtaining the object)

The pursuer (of the object)  the person (trying to obtain happiness)

The pursuit (of)/trying to catch (the object)  trying to obtain/attain happiness

The desire (to catch the object)  the desire (for happiness)

Catching the object  obtaining happiness

Version two: hidden desired object

The desired object  the happiness

The “hidden-ness” (of the object from us)  the difficulty (of obtaining the object)

The seeker (of the object)  the person (trying to obtain happiness)

The search (for the object)  trying to obtain/attain happiness

The desire (to find the object)  the desire (for happiness)

Finding the object  obtaining happiness

happiness is a desired object overlaps with a purposeful life is a journey.

freedom to act is freedom to move, action is motion (Event Structure Metaphor).

meaningful sequence of concepts, in which life, liberty, and the pursuit of happiness are closely related by virtue of their meaning.

happiness in the *United States Declaration of Independence*:

Goals in life:

Happiness is one of people’s main life goals.

It is a desired state.

It is an inalienable right of all people.

Action in accordance with the goals:

It is the responsibility of government to make sure that people can obtain it.

People devote their lives to trying to obtain it.

It is difficult to obtain.

It requires effort to obtain it.

It takes a long time to obtain it.

Once people have obtained it, it lasts a long time.

Desired result:

Achieving goals  Happiness

“People devote their lives to trying to obtain it.” meaning of life.

It is an inalienable right of all people.

It is one of people’s main life goals.

People devote their lives to trying to obtain it.

It is the responsibility of government to make sure that people can obtain it.

**Conclusions**

two prototypical models (meanings) for the concept. “happiness as an immediate response” (joy/happiness) and “happiness as a value” (happiness “proper”).

Happiness as an immediate response: a set of distinctive metonymies indicating physiological, expressive, and behavioral reactions (e.g., body warmth), as well as some inherent concepts (satisfaction, harmony, pleasure).

Happiness as a value: a set of distinctive metaphors: happiness is light, happiness is not heavy, happiness is up, happiness is being in heaven, and happiness is a hidden object.

*Declaration*: happiness is a moving desired object, a purposeful life is a journey, and free action is free motion.

**References**

Barcelona, Antonio. (ed.) 2000. *Metaphor and Metonymy at the Crossroads.* Berlin: Mouton de Gruyter.

Fabiszak, M. 2000. An application of the Natural Semantic Metaplanguage to diachronic semantics. In I. Taavitsainen, T. Nevalainen, P. Pahta, and M. Rissanen, eds. *Placing Middle English in Context*. Berlin: Mouton de Gruyter. 299-303.

Kövecses, Z. 1986. *Metaphors of Anger, Pride, and Love.* Amsterdam: John Benjamins.

Kövecses, Z. 1988. *The Language of Love.* Lewisburg: Bucknell University Press.

Kövecses, Z. 1990. *Emotion Concepts.* Berlin/New York: Springer Verlag.

Kövecses, Z. 1991. Happiness: A definitional effort. *Metaphor and Symbolic Activity*, 6(1), 29-46.

Kövecses, Z. 1999. Do metaphors constitute or reveal cognitive models?In Ray Gibbs and Gerard Steen (eds.) *Metaphor in Cognitive Linguistics*. Amsterdam: John Benjamins.

Kövecses, Z. 2000. *Metaphor and Emotion.* Cambridge: Cambridge University Press.

Kövecses, Z. 2002. *Metaphor. A Practical Introduction.* First edition. Oxford: Oxford University Press.

Kövecses, Z. 2005. *Metaphor in Culture. Universality and Variation.* Cambridge: Cambridge University Press.

Kövecses, Z. 2010. *Metaphor. A Practical Introduction.* Second revised edition. Oxford: Oxford University Press.

Kövecses, Z. In press. The biblical story retold: symbols in action. In Zic Fuchs, Milena, & Mario Brdar, eds., *Converging and Diverging Tendencies in Cognitive Linguistics*. Amsterdam: John Benjamins.

Kövecses, Z. and G. Radden. 1998. Metonymy: developing a cognitive linguistic view. *Cognitive Linguistics,* 9-1, 37-77.

Lakoff, G. 1987. *Women, Fire, and Dangerous Things. What Categories Reveal about the Mind.* Chicago: The University of Chicago Press.

Lakoff, G.1993. The contemporary theory of metaphor. In A. Ortony, ed., *Metaphor and Thought*, New York/Cambridge: Cambridge University Press.

Lakoff, G. 1996. *Moral Politics.* Chicago: The University of Chicago Press.

Lakoff, G. and M. Johnson. 1980. *Metaphors We Live By.* Chicago: The University of Chicago Press.

McGarvey, J. W.and Philip Y. Pendleton *The Fourfold Gospel* (1914) retrieved from http://www.biblestudyguide.org/comment/mcgarvey/four-fold-gospel/FFG000.HTM

Panther, U-K. and G. Radden. Eds. 1999. *Metonymy in Language and Thought.* Amsterdam: John Benjamins.

Quinn, N. 1991. The cultural basis of metaphor. In J. Fernandez, ed., *Beyond Metaphor. The Theory of Tropes in Anthropology.* 56-93. Stanford: Stanford University Press.

Rosch, E. 1978. Principles of categorization. In E. Rosch and B. B. Lloyd, eds., *Cognition and Categorization*, 27-48. Hillsdale, NJ: Lawrence Erlbaum.

Stefanowitsch, A. 2004. Happiness in English and German: A metaphorical-pattern analysis. In Michel Achard and Suzanne Kemmer, eds., *Language*, *Culture*, *and Mind*. Stanford: CSLI.

Talmy, L. 1988. Force dynamics in language and cognition. *Cognitive Science* 12, 49-100.

Tissari, Heli. 2008. "On the concept of sadness: Looking at words in contexts derived from corpora." *Corpus Linguistics, Computer Tools, and Applications: State of the Art* (PALC 2007), ed. by Barbara Lewandowska-Tomaszczyk. Frankfurt am Main: Peter Lang. 291-308.

Tseng, Meylysa, Yiran Hu, Wen- Wei Han, and Benjamin Bergen. 2007. “Searching for Happiness” or “Full of Joy”? Source Domain Activation Matters. *Proceedings of the 31st Annual Meeting of the Berkeley Linguistics Society.*

Wierzbicka, A. 1999. *Emotions Across Language and Cultures*. Cambridge: Cambridge University Press.
